# Supplementary material for: Systematic Review of Treatment Failure and Clinical Relapses in Leishmaniasis from a Multifactorial Perspective: Clinical Aspects, Factors Associated with the Parasite and Host
Source: MDPI journal article supplement (doi:10.3390/tropicalmed8090430), 2023-08-29
Supplement: s1 [file s1]

**Table S1:** Summary of articles categorized as case reports

| References | Place of occurrence | Gender                  | Age                | Clinical manifestation | Leishmania species     | Unsuccessful treatment                 | Successful treatment                        | Clinical outcome   | Immuno-suppression and comorbidities | Suggested mechanisms for failure/relapse by authors   |
|------------|---------------------|-------------------------|--------------------|------------------------|------------------------|----------------------------------------|---------------------------------------------|--------------------|--------------------------------------|-------------------------------------------------------|
| [12]       | Venezuela           | M                       | 58                 | CL                     | <i>L. braziliensis</i> | AmB e FLU                              | L-AmB                                       | Clinical cure      | N.I.                                 | Dose-dependent resistance of the species              |
| [13]       | Brazil              | M                       | 18                 | CL                     | <i>L. braziliensis</i> | GLU                                    | GLU + Pentoxifylline                        | Clinical cure      | No                                   | Inappropriate initial treatment                       |
| [14]       | Brazil              | M                       | 3                  | VL                     | <i>L. infantum</i>     | L-AmB                                  | AmB+GLU+SS                                  | Clinical cure      | N.I.                                 | N.I.                                                  |
| [15]*      | French Guiana       | M (7 patients)          | N.I.               | CL                     | <i>L. guyanensis</i>   | PENT (IL or IM)                        | PENT                                        | Clinical cure      | N.I.                                 | Route of drug administration                          |
| [16]       | Belgium             | F                       | 52                 | VL, CL e MCL           | <i>L. infantum</i>     | L-AmB e AmB lipid complex. MIL e AmB.  | GLU (CL) and PAR + MIL (VL)                 | Death              | Yes                                  | Host immunological factors                            |
| [17]       | Greece              | F                       | 64                 | CL                     | <i>L. tropica</i>      | GLU                                    | GLU+ cryosurgery with liquid nitrogen       | Clinical cure      | N.I.                                 | N.I.                                                  |
| [18]*      | Brazil              | M/M (2 patients)        | 23/ 54             | VL                     | <i>L. infantum</i>     | GLU, AmB e PENT/ GLU e AmB             | Splenectomy + AmB/ Splenectomy + AmB        | Clinical cure      | No                                   | N.I.                                                  |
| [19]*      | Colombia            | F/M/M/ M/M (5 patients) | 0.6/5/ 23/27/2 5   | CL                     | <i>L. panamensis</i>   | GLU IL/ GLU IL/ GLU IL/ GLU IL, GLU IM | GLU IM/ GLU-IM/ GLU IM/ GLU-IM/ Cryotherapy | Clinical cure      | N.I.                                 | N.I.                                                  |
| [20]       | France              | F                       | 8                  | VL                     | <i>L. infantum</i>     | L-AmB e AmB                            | Anti-TNF $\alpha$                           | Clinical cure      | Yes                                  | Host immunological factors                            |
| [21]       | Greece              | M                       | 64                 | VL                     | <i>L. infantum</i>     | GLU                                    | L-AmB                                       | Clinical cure      | No                                   | Mixed infection by two strains                        |
| [22]       | Honduras            | M                       | 3                  | VL                     | N.I.                   | GLU                                    | Not applicable                              | Death              | No                                   | Inappropriate initial treatment                       |
| [23]       | Pakistan            | M                       | 50                 | CL                     | <i>L. tropica</i>      | SS e AmB                               | SS+ Itraconazole                            | Clinical cure      | No                                   | N.I.                                                  |
| [24]       | Spain               | F                       | 87                 | CL                     | N.I.                   | Rifampicin and PAR cream 15%           | GLU IL                                      | Clinical cure      | No                                   | Inappropriate initial treatment                       |
| [25]       | Brazil              | M                       | 32                 | CL                     | <i>L. naiffi</i>       | PENT                                   | Surgical removal of the lesion              | Clinical cure      | No                                   | Presence of LRV virus                                 |
| [26]       | Argentina           | M                       | 65                 | MCL                    | <i>L. braziliensis</i> | AmB e MIL                              | Itraconazole + GLU IL+PENT IV+L-AmB aerosol | Clinical cure      | Yes                                  | Host immunological factors                            |
| [27]*      | France/Algeria      | M/F                     | 44/33 (2 patients) | VL                     | <i>L. infantum</i>     | GLU, AmB IV, GLU/L-AmB                 | PENT                                        | Clinical cure/N.I. | Yes/Yes                              | Host immunological factors/Host immunological factors |
| [28]       | Syria               | M                       | 8                  | CL                     | N.I.                   | GLU IL and GLU IM                      | FLU + cryotherapy                           | Clinical cure      | No                                   | Host immunological factors                            |
| [29]       | Palestine           | M                       | 12                 | CL                     | <i>L. tropica</i>      | SS IL                                  | Not applicable                              | N.I.               | No                                   | Parasite resistance or treatment interruption         |

| References | Place of occurrence            | Gender                | Age          | Clinical manifestation | Leishmania species                  | Unsuccessful treatment                                   | Successful treatment       | Clinical outcome | Immuno-suppression and comorbidities | Suggested mechanisms for failure/relapse by authors                                      |
|------------|--------------------------------|-----------------------|--------------|------------------------|-------------------------------------|----------------------------------------------------------|----------------------------|------------------|--------------------------------------|------------------------------------------------------------------------------------------|
| [30]       | Asia                           | M                     | 80           | VL                     | <i>L. donovani</i>                  | AmB-L                                                    | Not applicable             | Death            | Yes                                  | Host immunological factors                                                               |
| [31]       | India                          | M                     | 43           | VL                     | <i>L. donovani</i>                  | MIL, L-AmB and AmB                                       | L-AmB + MIL                | Clinical cure    | Yes                                  | Host immunological factors                                                               |
| [32]       | Albania                        | F                     | 8            | VL                     | N.I.                                | GLU                                                      | L-AmB                      | Clinical cure    | Yes                                  | N.I.                                                                                     |
| [33]       | Brazil                         | M                     | 0.6          | VL                     | N.I.                                | GLU, AmB and L-AmB                                       | GLU                        | Clinical cure    | No                                   | N.I.                                                                                     |
| [34]*      | Colombia                       | F/M (2 patients)      | 1.5/3        | VL                     | <i>L. infantum</i>                  | GLU and PENT                                             | L-AmB                      | Clinical cure    | No                                   | N.I.                                                                                     |
| [35]       | Nepal                          | M                     | 19           | VL                     | <i>L. donovani</i>                  | MIL                                                      | AmB                        | Clinical cure    | No                                   | Parasite resistance                                                                      |
| [36]       | Brazil                         | M                     | 46           | DCL                    | <i>L. amazonensis</i>               | GLU, L-AmB, GLU, L-AmB+PENT, PENT, L-AmB+GLU, GLU        | Not applicable             | N.I.             | Yes                                  | Host immunological factors                                                               |
| [37]*      | France/Georgia/Georgia/Algeria | M/ F/M/M (4 patients) | 58/1.5/37/75 | VL                     | N.I./ N.I./N.I./ <i>L. infantum</i> | L-AmB, L-AmB+MIL/ L-AmB, L-AmB+MIL/ L-AmB and GLU/ L-AmB | GLU/ GLU/ GLU and MIL/ GLU | Clinical cure    | Yes/ No/ Yes/ Yes                    | Host immunological factors/ N.I./ Host immunological factors/ Host immunological factors |

\* These articles describe case reports for more than one patient. The information for these patients in the columns are separated by slashes (/).

In the columns “successful treatment” and “unsuccessful treatment”, drugs and therapies linked by “and” indicate treatment cycles at different times, while drugs linked by “+” indicate combined therapy

M-male; F-female; CL- cutaneous leishmaniasis; VL- visceral leishmaniasis; MCL- mucocutaneous leishmaniasis; DCL- diffuse cutaneous leishmaniasis; FLU- fluconazole; GLU- meglumine antimoniate (Glucantime<sup>®</sup>) ; SS- sodium stiboglucanate (Pentostan<sup>®</sup>); PENT- pentamidine; PAR- paromomycin; AmB- amphotericin B; L-AmB- liposomal amphotericin B; MIL- miltefosine; IL- intralesional; IM- intramuscular; N.I.- not informed.
